# Supplementary material for: Resveratrol inhibits IL-33–mediated mast cell activation by targeting the MK2/3–PI3K/Akt axis
Source: PubMed Central journal article supplement (PMC6895112; doi:10.1038/s41598-019-54878-5), 2019-12-05

## **Resveratrol inhibits IL-33–mediated mast cell activation by targeting the MK2/3–PI3K/Akt axis**

**Shotaro Nakajima,<sup>1,5,6,7,†</sup> Kayoko Ishimaru,<sup>1,7</sup> Anna Kobayashi,<sup>1,2</sup> Guannan Yu,<sup>1</sup>  
Yuki Nakamura,<sup>1</sup> Kyoko Oh-oka,<sup>4</sup> Katsue Suzuki-Inoue,<sup>3</sup> Koji Kono<sup>5</sup>  
and Atsuhito Nakao<sup>1, ††</sup>**

<sup>1</sup>*Department of Immunology,* <sup>2</sup>*Department of Pediatrics,* <sup>3</sup>*Department of Clinical and  
Laboratory Medicine, Faculty of Medicine, University of Yamanashi, Yamanashi, Japan,*

<sup>4</sup>*Department of Immunology, Faculty of Medicine, Tsukuba Advanced Research Alliance  
(TARA), University of Tsukuba, Tsukuba, Japan*

<sup>5</sup>*Department of Gastrointestinal Tract Surgery,* <sup>6</sup>*Department of Progressive DOHaD  
Research, Faculty of Medicine, Fukushima Medical University*

<sup>7</sup>*These authors equally contributed to this work*

†, †† **Corresponding author:** Department of Immunology, University of Yamanashi  
Faculty of Medicine, 1110 Shimokato, Chuo, Yamanashi 409-3898, Japan

Tel.: +81-55-273-6752; Fax.: +81-55-273-9542

E-mail: ipsho555@gmail.com (S. Nakajima), anakao@yamanashi.ac.jp (A. Nakao)

Present address (S. Nakajima): Department of Progressive DOHaD Research, Department  
of Gastrointestinal Tract Surgery, School of Medicine, Fukushima Medical University, 1  
Hikariga-oka, Fukushima City, Fukushima 960-1295, Japan

**Running title:** Resveratrol inhibits IL-33–mediated mast cell activation.

**Abbreviations:** AMPK, AMP-activated protein kinase; ERK, extracellular-signal-regulated kinase; IKK, I $\kappa$ B kinase; IL-33, interleukin-33; JNK, c-Jun NH<sub>2</sub>-terminal kinase; MAPK, mitogen-activated protein kinase; NF- $\kappa$ B, nuclear factor- $\kappa$ B; PI3K, phosphatidylinositol 3-kinase; PLC, phospholipase C; TAK1, transforming growth factor  $\beta$ –activated kinase 1; TNF, tumor necrosis factor

## **Supplementary Figure Legends**

**Supplementary Figure 1. Effect of resveratrol on cell survival and mRNA expression in BMMCs.** (A) Flow cytometry analysis of Annexin V and 7-AAD in BMMCs treated with 10–100  $\mu$ M resveratrol for 6 h (n=3). (B) WST assay of BMMCs treated with the indicated concentrations of resveratrol for 6 h (n=3). Data were represented as OD. (C) qPCR of IL-6, IL-13, and TNF- $\alpha$  in BMMCs stimulated with IL-33 for 1 h in the presence or absence of 25  $\mu$ M resveratrol (n=3). (D) Flow cytometry analysis of Fc $\epsilon$ RI and c-kit in FSMCs. \* $P$ <0.05, \*\* $P$ <0.01, \*\*\*\* $P$ <0.0001.

**Supplementary Figure 2. Effect by resveratrol on estrogen receptor-mediated inhibition of cytokine expression by IL-33 in BMMCs.** qPCR of IL-6, IL-13, and TNF- $\alpha$  in BMMCs stimulated with antigen for 1 h in the presence or absence of 25  $\mu$ M resveratrol and/or ICI 182,780 (n=3). \* $P$ <0.05, \*\*\*\* $P$ <0.0001.

**Supplementary Figure 3. Effect by combination of resveratrol and PF on IL-33–**

**triggered cytokine expression in BMMCs.** ELISA of IL-6 and IL-13 in BMMCs stimulated with IL-33 for 6 h in the presence or absence of 10  $\mu$ M PF or combination of PF and 25  $\mu$ M resveratrol (n=3). \*\*\* $P$ <0.001, \*\*\*\* $P$ <0.0001; n.s., not significant.

**Supplementary Figure 4. Effect of resveratrol on SCF-mediated activation of Akt in BMMCs.** (A) Western blot analysis of phospho-Akt, phospho-p70S6K, and phospho-p38 in BMMCs stimulated with 1 ng/ml IL-33 or 100 ng/ml SCF for 15 min in the presence or absence of 25  $\mu$ M resveratrol. The level of  $\beta$ -actin is shown at the bottom as a loading control.

**Supplementary Figure 5. Effect of resveratrol on IgE-mediated mast cell activation.** (A) Intracellular  $\text{Ca}^{2+}$  mobilization in BMMCs stimulated with antigen for up to 180 sec in the presence or absence of resveratrol (n=3). (B) Flow cytometry analysis of CD63 in BMMCs treated with antigen for 40 min in the presence or absence of 25  $\mu$ M resveratrol (n=3). (C) Release of  $\beta$ -hexosaminidase from BMMCs stimulated with antigen in the presence or absence of resveratrol (n=3). (D) ELISA of IL-6, IL-13,

and TNF- $\alpha$  in BMMCs treated with antigen for 6 h in the presence or absence of resveratrol (n=3). (E) Passive cutaneous anaphylaxis in dorsal skin of mice treated orally with 10 mg/kg resveratrol or 2% cyclodextrin in phosphate-buffered saline (PBS) (as a control) (n=4). The bottom panel shows the density of blue-stained in the upper panel. (F) Serum histamine levels after passive cutaneous anaphylaxis reaction in mice treated orally with 10 mg/kg resveratrol (n=3–4). \* $P$ <0.05, \*\* $P$ <0.01, \*\*\* $P$ <0.001, \*\*\*\* $P$ <0.0001.

**Supplementary Figure 6. Effect of resveratrol on basal and antigen-induced phosphorylation of AMPK in BMMCs.** (A) Western blot analysis of phospho-AMPK in BMMCs treated with 25  $\mu$ M resveratrol or 0.5 mM AICAR for up to 12 h. The level of  $\beta$ -actin is shown at the bottom as a loading control. (B) Western blot analysis of phospho-AMPK, phospho-Akt, and phospho-p38 in BMMCs stimulated with antigen for up to 10 min in the presence or absence of resveratrol or AICAR. The level of  $\beta$ -actin is shown at the bottom as a loading control.

**Supplementary Figure 7. Full-length blots shown in figures and supplementary figures.**

# Supplementary Figure 1

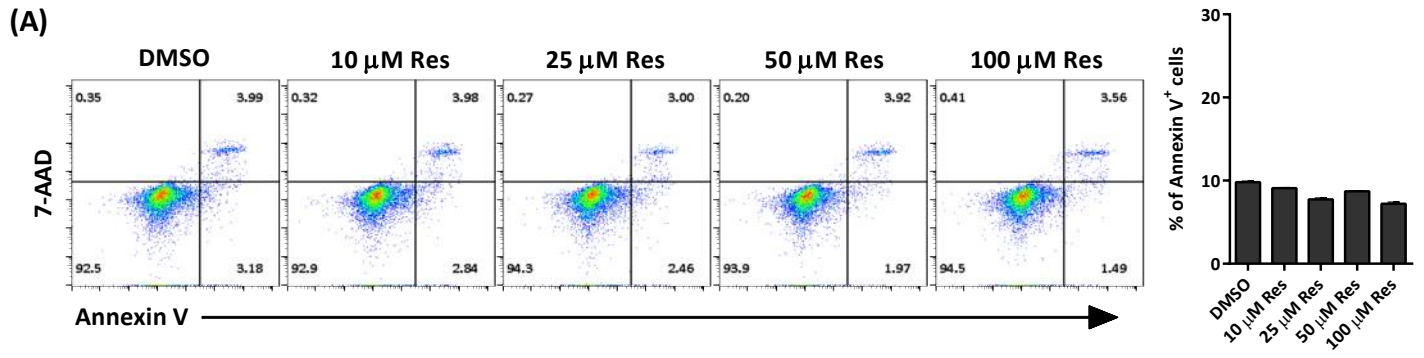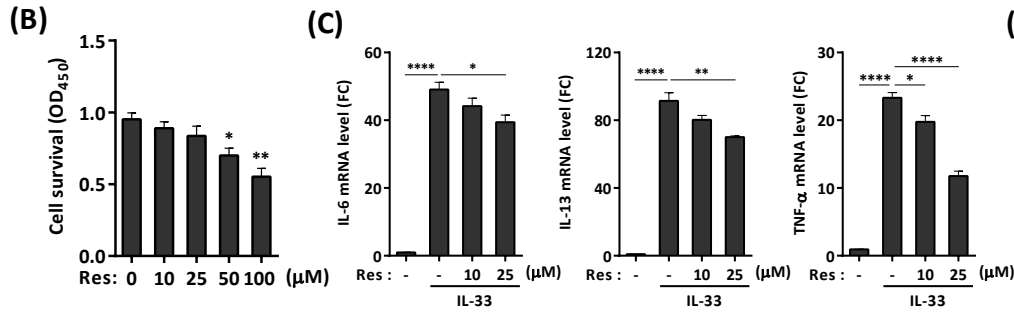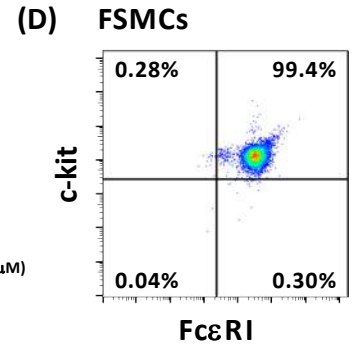

# Supplementary Figure 2

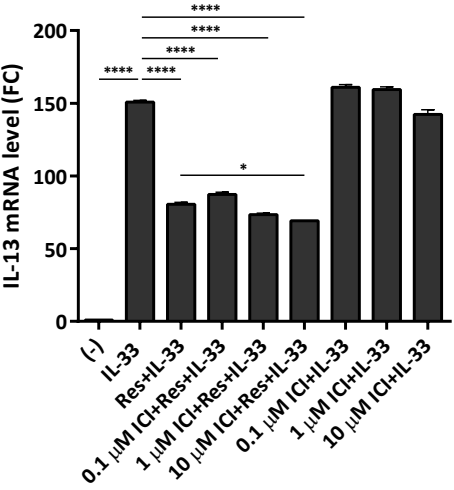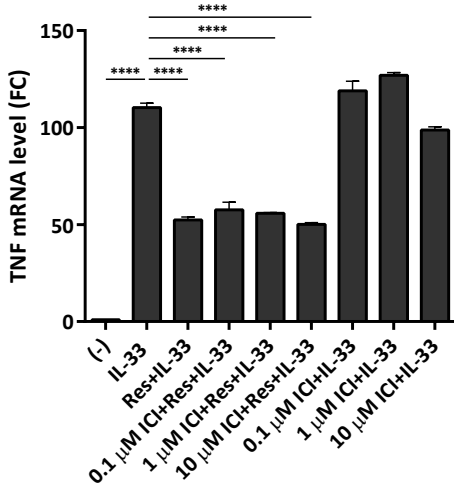

# Supplementary Figure 3

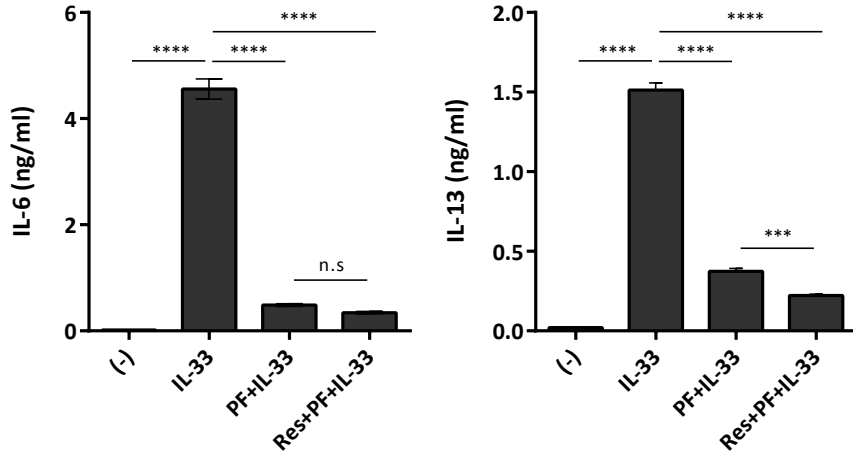



# Supplementary Figure 4

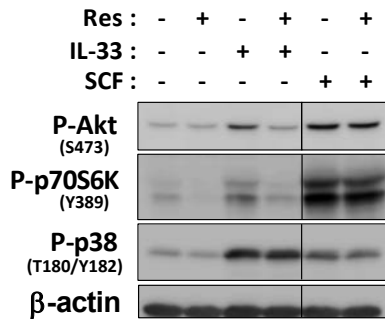

# Supplementary Figure 5

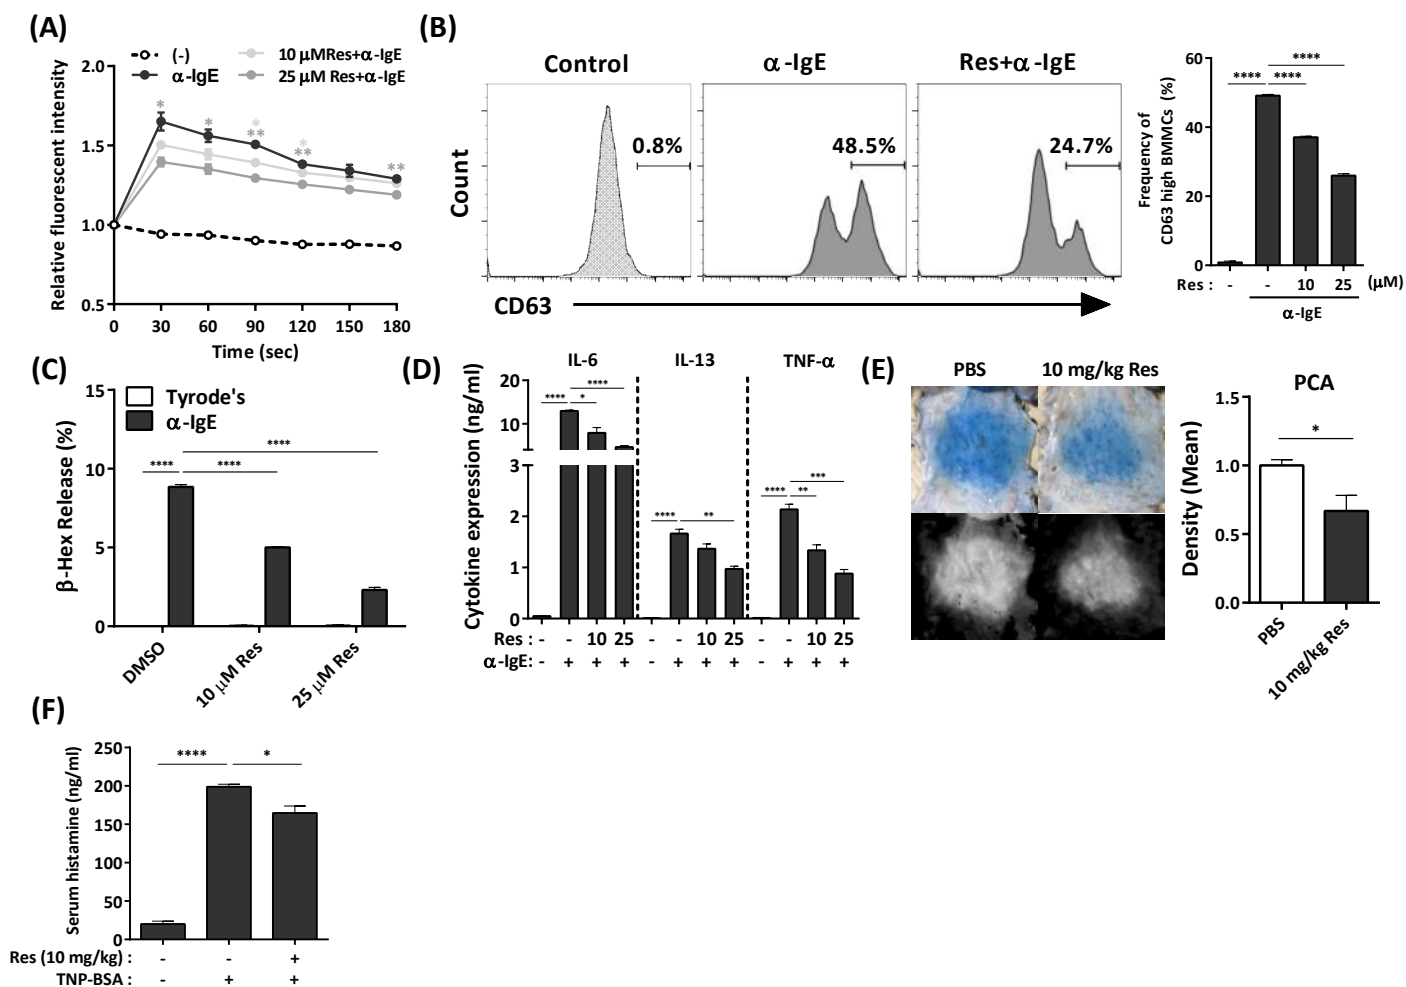

# Supplementary Figure 6

(A)

DMSO (h) : 1 - - 3 - - 6 - - 12 - -  
Res (h) : - 1 - - 3 - - 6 - - 12 -  
AICAR (h) : - - 1 - - 3 - - 6 - - 12

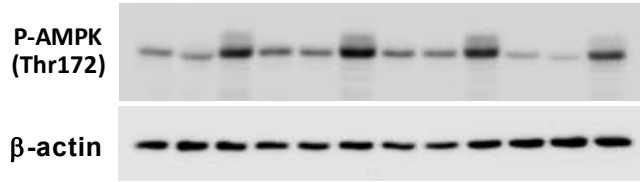

(B)

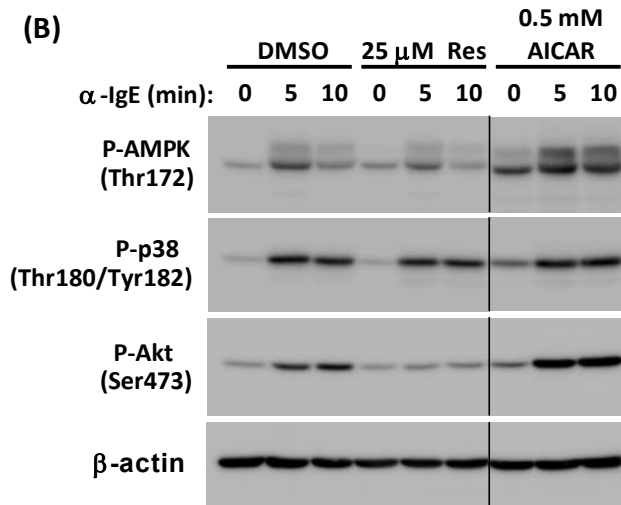

# Supplementary Figure 7-1

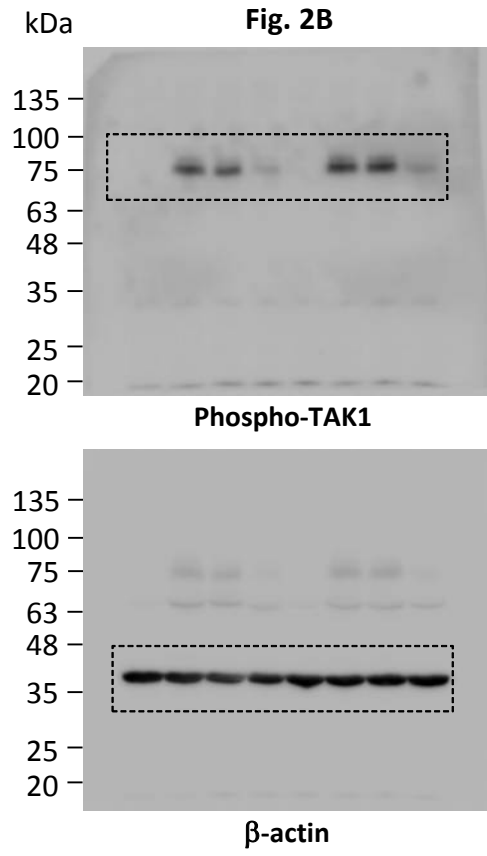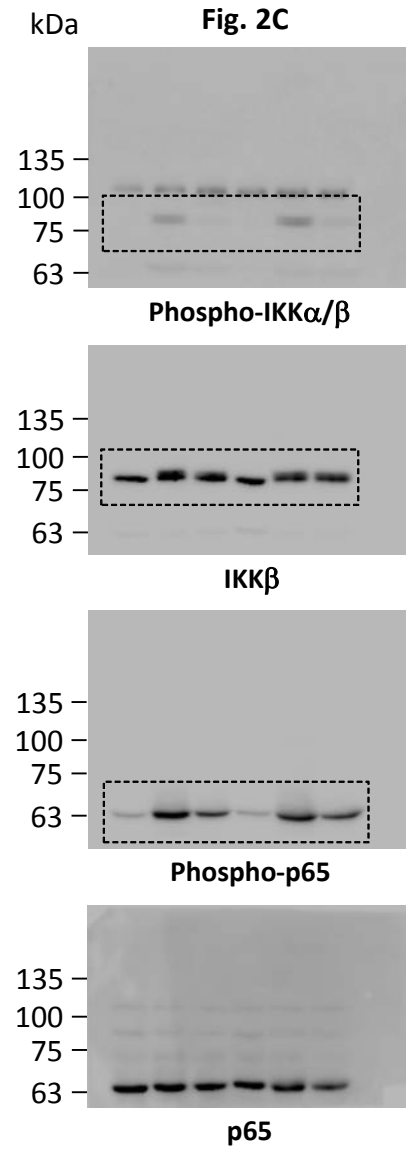

# Supplementary Figure 7-2

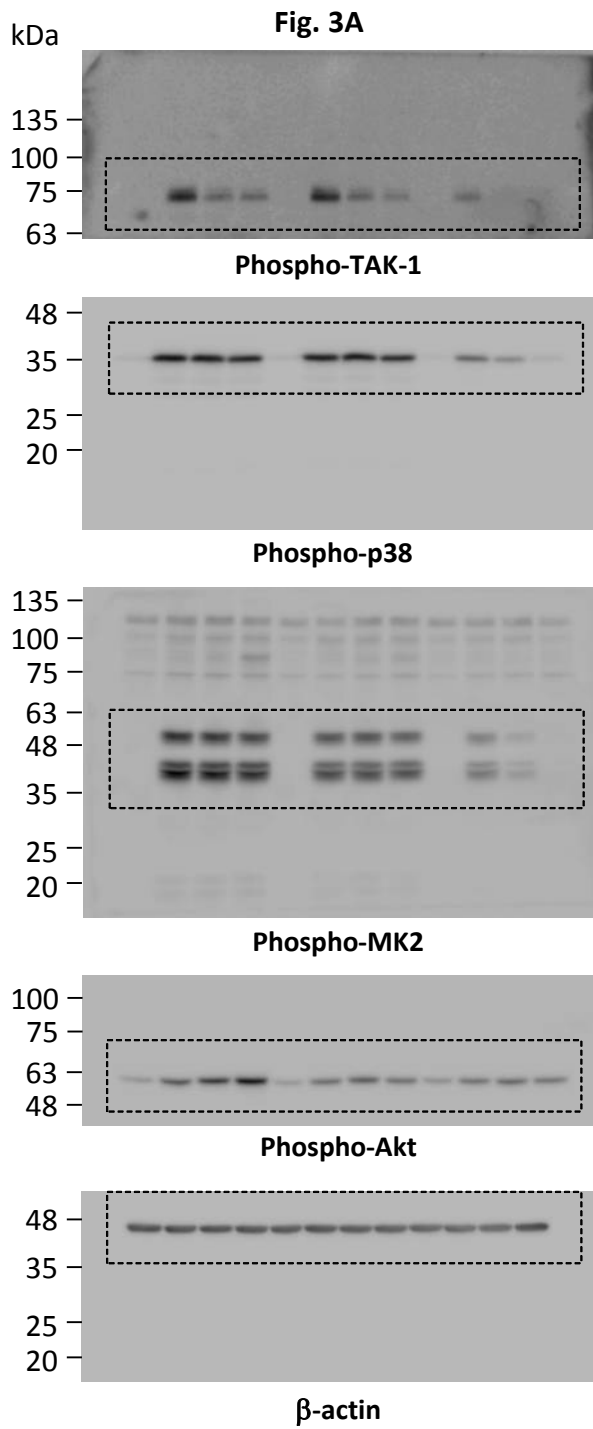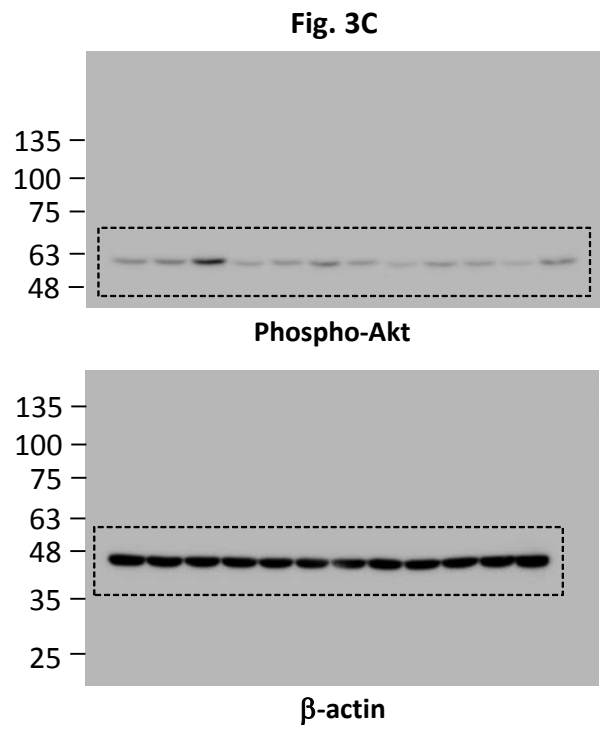

# Supplementary Figure 7-3

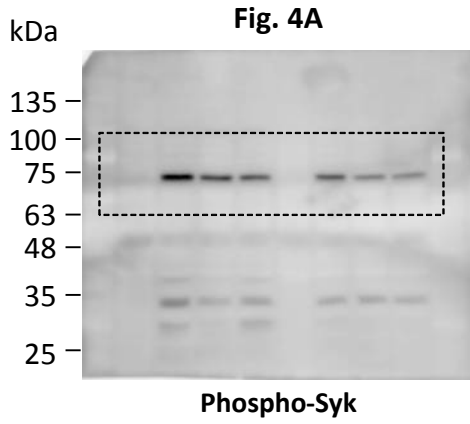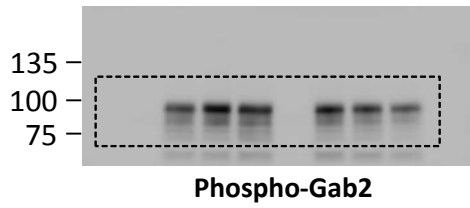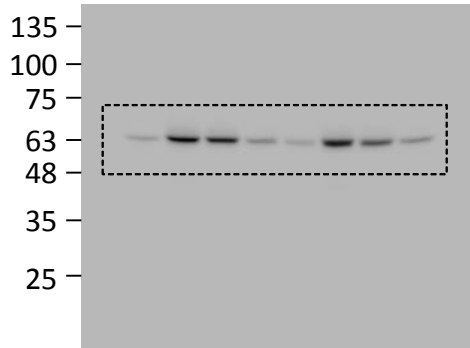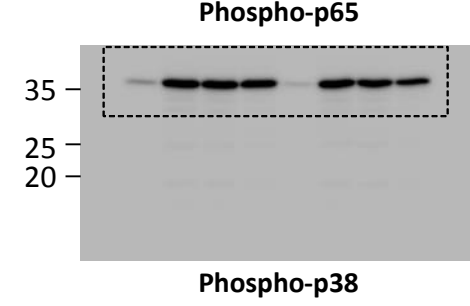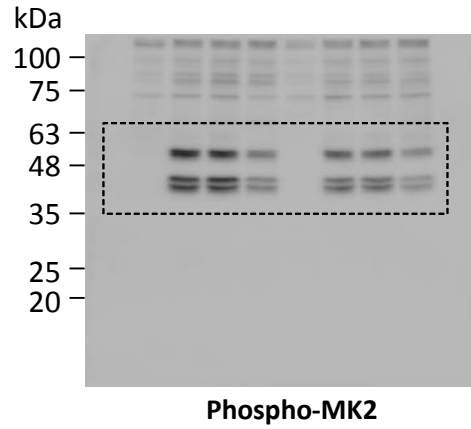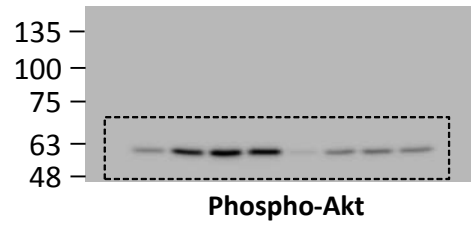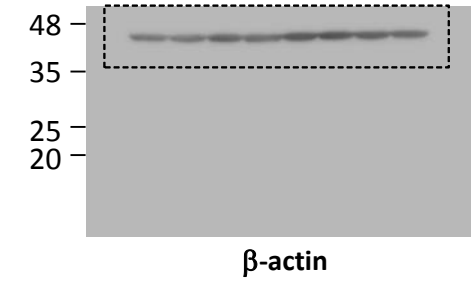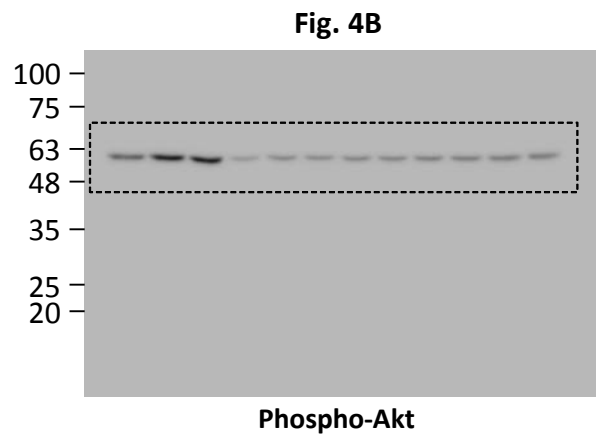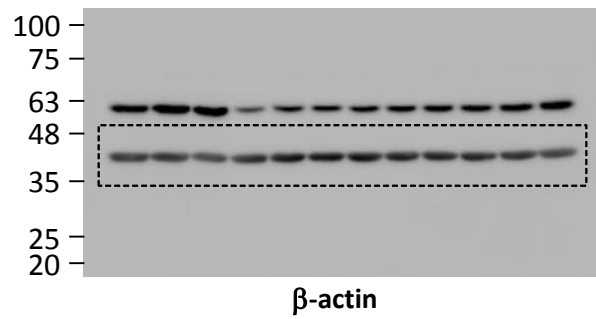

# Supplementary Figure 7-4

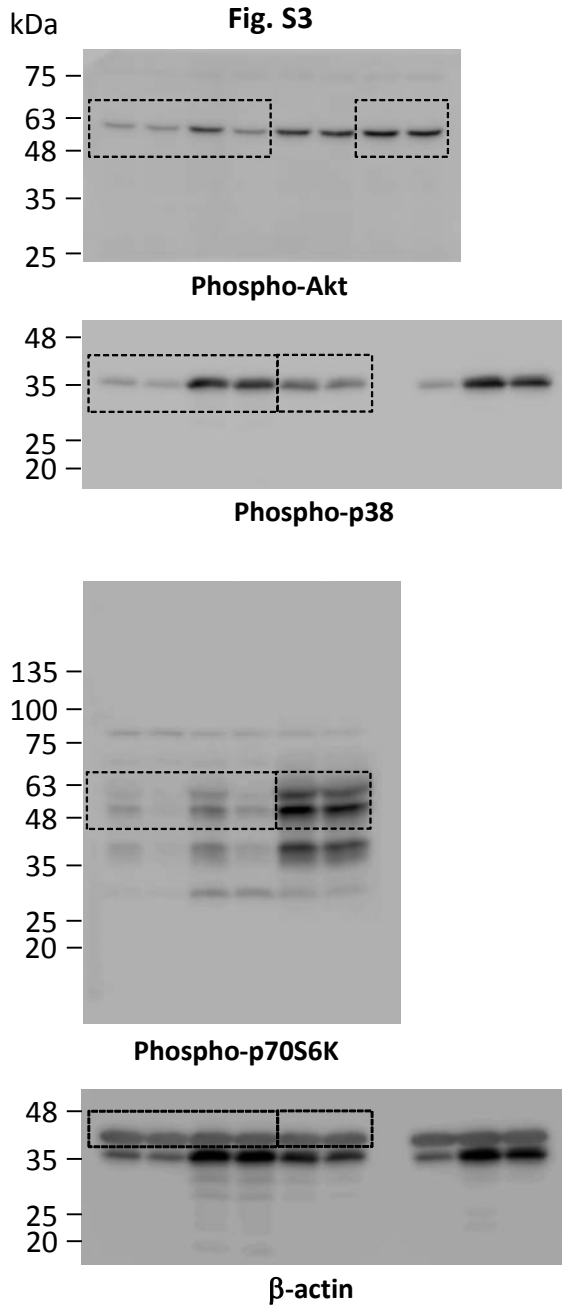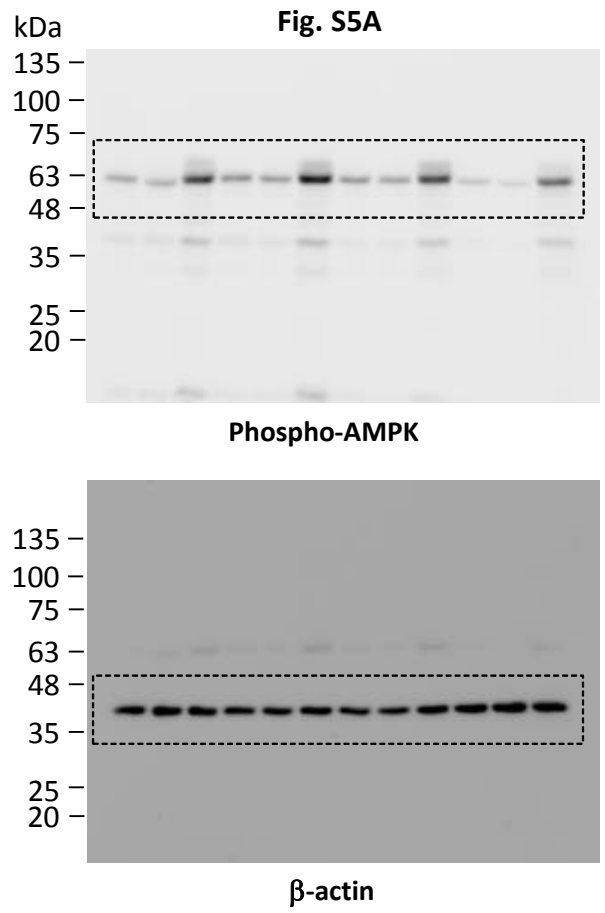

# Supplementary Figure 7-5

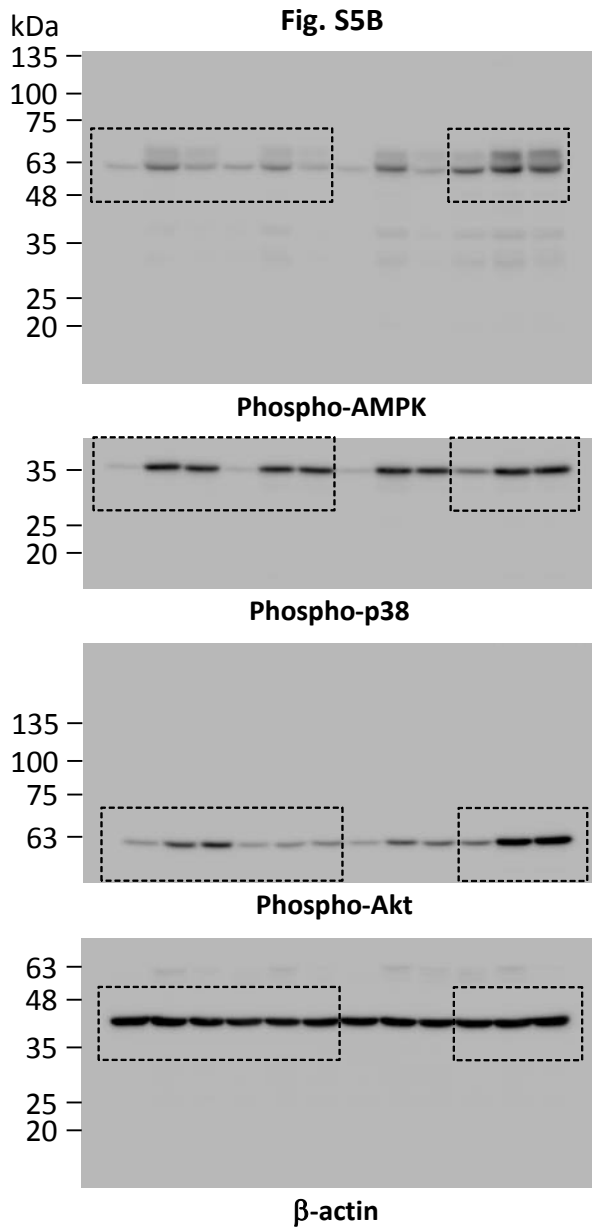

Supplement: 41598_2019_54878_MOESM1_ESM.pdf [file 41598_2019_54878_MOESM1_ESM.pdf]
